# Supplementary material
Source: Springer Nature journal article supplement (https://www.springermedizin.de/resource/supplementary/12943_2010_685_MOESM4_ESM.pdf/9554580)

**A**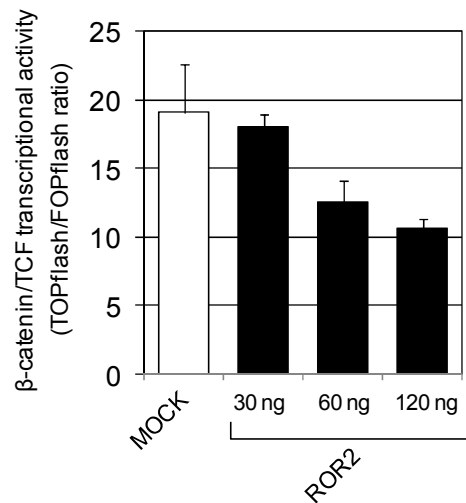**B**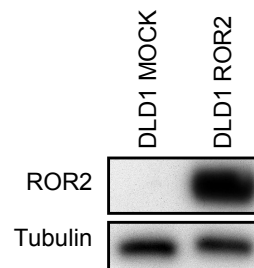**C**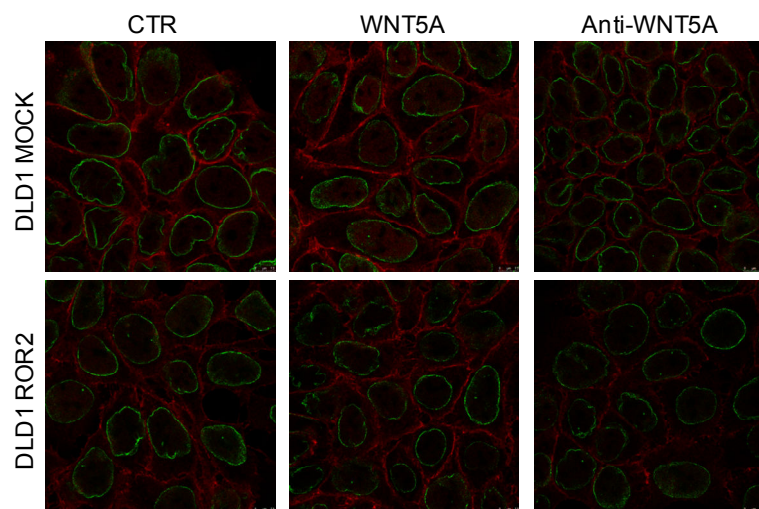 $\beta$ -CATENIN $\alpha$ -LAMIN B**D**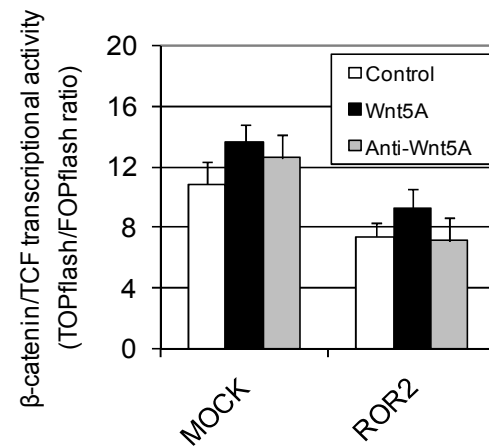

MOCK

ROR2

Anti-Wnt5A

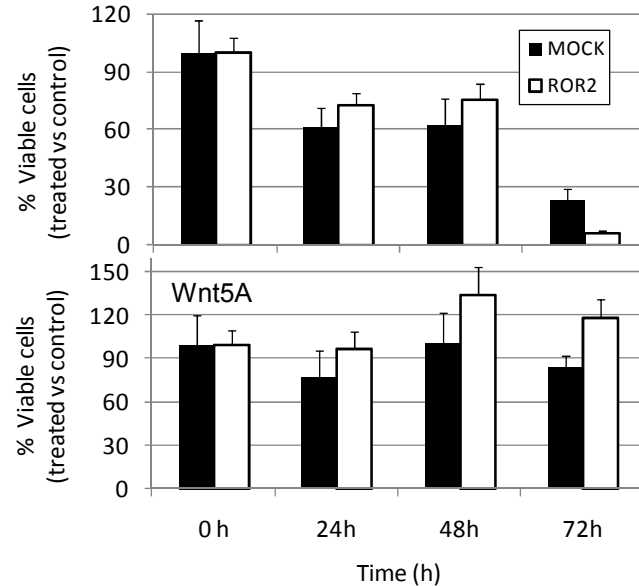

Wnt5A

0 h

24 h

48 h

72 h

Time (h)

Supplement: MOESM4 [file 9554580]
